# Supplementary material
Source: PubMed Central journal article supplement (PMC4463031)
Supplement: inf-34-753-s001.pdf [file inf-34-753-s001.pdf]

**Supplementary Table 1 Primer and probe sequences for the virus and human control****genes**

|                             | <b>Sequences</b><br><b>(5' → 3')</b>                                                                                                                                                                                          | <b>Target gene</b>      |
|-----------------------------|-------------------------------------------------------------------------------------------------------------------------------------------------------------------------------------------------------------------------------|-------------------------|
| Human Rhino virus           | F1: GCC TGC GTG GCT GCC<br>R1: CCT GCG TGG CGG CC<br>F2: ACG GAC ACC CAA AGT AGT TGG T<br>R2: ACG GAC ACC CAA AGT AGT CGG T<br>Probe1: FAM-TCC GGC CCC TGA ATG TGG CTA A-MGB<br>Probe2: FAM-TCC GGC CCC TGA ATG CGG CTA A-MGB | 5'UTR                   |
| Adenovirus                  | F: GCC SCA GTG GTC TTA CAT GCA CAT C<br>R: GCC ACG GTG GGG TTT CTA AAC TT<br>Probe: VIC-TGC ACC AGA CCS GGR CTC AGG TAC TCC GA-MGB                                                                                            | Hexon                   |
| Human Bocavirus             | F: GGA AGA GAC ACT GGC AGA CAA<br>R: GGG TGT TCC TGA TGA TAT GAG C<br>Probe: FAM- CTG CGG CTC CTG CTC CTG TGA T -TAMRA                                                                                                        | Nonstructural protein 1 |
| Human Metapneumovirus       | F: GAA GAR ATA GAC AAA GAR GCA AG<br>R: TCC CAC TTC TAT RGT TGA TGC TAG<br>Probe: NED-TCA GCA CCA GAC ACA CC-MGB                                                                                                              | Nucleoprotein           |
| Respiratory Syncytial Virus | F: GCA AAT ATG GAA ACA TAC GTG AAC A<br>R: GCA CCC ATA TTG TWA GTG ATG CA<br>Probe: FAM-CTT CAC GAA GGC TCC ACA TAC ACA GCW G-MGB                                                                                             | Matrix protein          |
| Polyomavirus WU             | F: GGC ACG GCG CCA ACT                                                                                                                                                                                                        | DNA Binding             |

|                   |                                                                                                                                                      |                              |
|-------------------|------------------------------------------------------------------------------------------------------------------------------------------------------|------------------------------|
|                   | R: CCT GTT GTA GGC CTT ACT TAC CTG TA<br>Probe: FAM-TGC CAT ACC AAC ACA GCT GCT GAG C-TAMRA                                                          | Protein Gp5                  |
| Polyomavirus KI   | F: ACC TGA TAC CGG CGG AAC T<br>R: CGC AGG AAG CTG GCT CAC<br>Probe: VIC-CCA CAC AAT AGC TTT CAC TCT TGG CGT GA                                      | <i>Non-translated region</i> |
| Parainfluenza 3   | F: AGT CAT GTT CTC TAG CAC TCC TAA ATA CA<br>R: ATT GAG CCA TCA TAA TTG ACA ATA TCA A<br>Probe:VIC-AAC TCC CAA AGT TGA TGA AAG ATC AGA TTA TGC A-MGB | Hemagglutinin-neuraminidase  |
| Parainfluenza 1   | F: GGC TAA AGA AAA GAC AAG TTG TCA ATG<br>R: TCG GCA CCT AAG TAA TTT TGA GTT A<br>Probe: NED-TAT TTA TCT GAT AGG CCA AAR ATT- MGB                    | Hemagglutinin-neuraminidase  |
| Parainfluenza 2   | F: TGG GGA TAA TAC AAC AAT CTG CTG C<br>R: ACC TCC TGG TAT AGC AGT GAC TGA AC<br>Probe: FAM-CCA TTT ACC TAA GTG ATG GAA TCA ATC GCA AA-MGB           | Hemagglutinin-neuraminidase  |
| Influenza-B       | F: AAA TAC GGT GGA TTA AAY AAA AGC AA<br>R: CCA GCA ATA GCT CCG AAG AAA<br>Probe: VIC-CAC CCA TAT TGG GCA ATT TCC TAT GCC-MGB                        | Hemagglutinin                |
| Influenza-A       | F: GAC CRA TCC TGT CAC CTC TGA C<br>R: AGG GCA TTY TGG ACA AAK CGT CTA<br>Probe: FAM-TGC AGT CCT CGC TCA CTG GGC ACG-MGB                             | Matrix protein 2             |
| Swine Influenza-A | F: GCA CGG TCA GCA CTT ATY CTR AG                                                                                                                    | Nucleocapsid                 |

|                                               |                                                                                                                                                   |               |
|-----------------------------------------------|---------------------------------------------------------------------------------------------------------------------------------------------------|---------------|
|                                               | <p>R: GTG RGC TGG GTT TTC ATT TGG TC</p> <p>Probe: NED-CYA CTG CAA GCC CAT ACA CAC AAG CAG GCA-MGB</p>                                            | protein       |
| Swine H1                                      | <p>F: GTG CTA TAA ACA CCA GCC TYC CA</p> <p>R: CGG GAT ATT CCT TAA TCC TGT RGC</p> <p>Probe: VIC-CA GAA TAT ACA TCC RGT CAC AAT TGG ARA A-MGB</p> | Hemagglutinin |
| Human<br>ribonuclease                         | <p>F: AGA TTT GGA CCT GCG AGC G</p> <p>R: GAG CGG CTG TCT CCA CAA GT</p> <p>Probe: NED-TTC TGA CCT GAA GGC TCT GCG CG-MGB</p>                     |               |
| Human<br>glyceraldehyde-3-<br>P dehydrogenase | <p>F: GCT CCT CCT GTT CGA CAG TCA</p> <p>R: ACC TTC CCC ATG GTG TCT GA</p> <p>Probe: NED-CGT CGC CAG CCG AGC CAC A-MGB</p>                        |               |
