# Supplementary material
Source: PubMed Central journal article supplement (PMC4463031)
Supplement: inf-34-753-s002.pdf [file inf-34-753-s002.pdf]

Supplementary Table 2 Proportion of *Streptococcus pneumoniae* and *Haemophilus influenzae* serotypes by AOM episodes

|                                               | HIV+ (N=15)    |      | HIV- (N=182) |     | HEU (N=63) |      | Overall (N=260)  |     |
|-----------------------------------------------|----------------|------|--------------|-----|------------|------|------------------|-----|
|                                               | n              | %    | n            | %   | n          | %    | n                | %   |
| <b><i>Streptococcus pneumoniae</i> (N=53)</b> |                |      |              |     |            |      |                  |     |
| <b><u>Vaccine types</u></b>                   |                |      |              |     |            |      |                  |     |
| <b>1</b>                                      | 1 <sup>^</sup> | 50.0 | -            | -   | -          | -    | 1                | 1.9 |
| <b>3</b>                                      | -              | -    | 1            | 2.7 | 1          | 7.1  | 2                | 3.8 |
| <b>4</b>                                      | -              | -    | 3            | 8.1 | 1          | 7.1  | 4                | 7.5 |
| <b>5</b>                                      | -              | -    | 1            | 2.7 | -          | -    | 1                | 1.9 |
| <b>6A</b>                                     | -              | -    | 2            | 5.4 | 2          | 14.3 | 4                | 7.5 |
| <b>6B</b>                                     | 1 <sup>^</sup> | 50.0 | 2            | 5.4 | 1          | 7.1  | 3+1 <sup>^</sup> | 7.5 |
| <b>9V</b>                                     | -              | -    | 1            | 2.7 | 1          | 7.1  | 2                | 3.8 |
| <b>14</b>                                     | -              | -    | 3            | 8.1 |            |      | 3                | 5.7 |
| <b>18C</b>                                    | -              | -    | 1            | 2.7 | -          | -    | 1                | 1.9 |

21 April 2014

|            |   |      |      |      |   |      |       |      |
|------------|---|------|------|------|---|------|-------|------|
| <b>19A</b> | 1 | 50.0 | 4    | 10.8 | 1 | 7.1  | 6     | 11.3 |
| <b>19F</b> | - | -    | 7+1^ | 21.6 | 4 | 28.6 | 11+1^ | 22.6 |
| <b>23F</b> | - | -    | 2+2^ | 10.8 | - | -    | 2+2^  | 7.5  |

---

**Non-vaccine types**

|            |   |   |      |     |   |      |      |      |
|------------|---|---|------|-----|---|------|------|------|
| <b>9N</b>  | - | - | 1    | 2.7 | - | -    | 1    | 1.9  |
| <b>15B</b> | - | - | 3    | 8.1 | 3 | 21.4 | 6    | 11.3 |
| <b>15C</b> | - | - | 1    | 2.7 | - | -    | 1    | 1.9  |
| <b>16F</b> | - | - | 2+1^ | 8.1 | - | -    | 2+1^ | 8.1  |
| <b>21</b>  | - | - | 1    | 2.7 | - | -    | 1    | 1.9  |

---

***Haemophilus influenzae* (N=80)**

|                     |   |      |    |     |    |     |    |      |
|---------------------|---|------|----|-----|----|-----|----|------|
| <b>F</b>            | 1 | 14.3 | -  | -   | -  | -   | 1  | 1.3  |
| <b>Non-typeable</b> | 6 | 85.7 | 53 | 100 | 20 | 100 | 79 | 98.8 |

**(NTHI)**

---

^Corresponds to two samples collected from one episode that tested positive for more than one *S. pneumoniae* serotype

21 April 2014

N: total number of episodes positive for each bacterium; n: number of episodes; %: percentage of episodes in a bacterial category positive for each serotype

HIV+: Children confirmed to be HIV-infected; HIV-: Children confirmed to be HIV-uninfected; HEU: children born to HIV-infected mothers and confirmed to be HIV-uninfected
