# Supplementary material
Source: PubMed Central journal article supplement (PMC4463031)
Supplement: inf-34-753-s003.pdf [file inf-34-753-s003.pdf]

**Supplementary Table 3 Viral co-infections associated with AOM episodes (IFA and rRT-PCR combined)**

| <b>Viruses with co-infections</b>         | <b>Single virus</b> | <b>2 viruses</b> | <b>3 viruses</b> | <b>≥3 viruses</b> |
|-------------------------------------------|---------------------|------------------|------------------|-------------------|
|                                           | <b>%</b>            | <b>%</b>         | <b>%</b>         | <b>%</b>          |
| <b>Human Rhinovirus (N=98)</b>            | 58                  | 29               | 10               | 3                 |
| <b>Adenovirus (N=37)</b>                  | 24                  | 35               | 33               | 8                 |
| <b>Human Bocavirus (N=30)</b>             | 23                  | 50               | 17               | 10                |
| <b>Influenza-A (N=21)</b>                 | 72                  | 14               | 14               | -                 |
| <b>Influenza-B (N=17)</b>                 | 35                  | 35               | 18               | 12                |
| <b>Respiratory Syncytial Virus (N=19)</b> | 37                  | 16               | 37               | 10                |
| <b>Human Metapneumovirus (N=18)</b>       | 56                  | 22               | 11               | 11                |
| <b>Parainfluenza viruses 1-3 (N=23)</b>   | 39                  | 22               | 30               | 9                 |

N: Total number of episodes positive for a specific virus

#: Percentage of episodes with viral co-infections

IFA: immunofluorescence assay; rRT-PCR: real-time reverse transcriptase-PCR
